# Supplementary material for: Stabilizing a zinc anode via a tunable covalent organic framework-based solid electrolyte interphase
Source: Royal Society of Chemistry journal article supplement (doi:10.1039/d3nr00898c), 2023-01-01
Supplement: d3nr00898c1.pdf [file d3nr00898c1.pdf]

# Stabilizing zinc anode via tunable covalent organic frameworks-based solid electrolyte interphase

Vipada Aupama<sup>1</sup>, Wathanyu Kao-ian<sup>1</sup>, Jinnawat Sangsawang<sup>1</sup>, Gopalakrishnan Mohan<sup>1</sup>,  
Suttipong Wannapaiboon<sup>2</sup>, Ahmad Azmin Mohamad<sup>3</sup>, Prasit Pattanauwat<sup>4,5</sup>, Chakrit  
Sriprachuabwong<sup>6</sup>, Wei-Ren Liu<sup>7</sup>, Soorathep Kheawhom<sup>1,5,8,\*</sup>

<sup>1</sup> Department of Chemical Engineering, Faculty of Engineering, Chulalongkorn University, Bangkok 10330, Thailand

<sup>2</sup> Synchrotron Light Research Institute, 111 University Avenue, Muang District, Nakhon Ratchasima 30000, Thailand

<sup>3</sup> School of Materials and Mineral Resources Engineering, Universiti Sains Malaysia, Nibong Tebal, Pulau Pinang 14300, Malaysia

<sup>4</sup> Department of Materials Science, Faculty of Science, Chulalongkorn University, Bangkok 10330, Thailand

<sup>5</sup> Center of Excellence on Advanced Materials for Energy Storage, Chulalongkorn University, Bangkok 10330, Thailand

<sup>6</sup> National Science and Technology Development Agency, Pathumthani 12120, Thailand

<sup>7</sup> Department of Chemical Engineering, Research Center for Circular Economy, Chung Yuan Christian University, Chung Li, Taiwan (R.O.C.)

<sup>8</sup> Bio-Circular-Green-economy Technology & Engineering Center (BCGeTEC), Faculty of Engineering, Chulalongkorn University, Bangkok 10330, Thailand

*\*Corresponding author: soorathep.k@chula.ac.th*

| <b>Section</b> |                                                                                          |
|----------------|------------------------------------------------------------------------------------------|
| <b>S-1</b>     | <b>Field emission scanning electron microscope (FE-SEM)</b>                              |
| <b>S-2</b>     | <b>Powder X-ray diffraction (PXRD) spectra of COF powder</b>                             |
| <b>S-3</b>     | <b>X-ray photoelectron spectroscopy (XPS)</b>                                            |
| <b>S-4</b>     | <b>Electrochemical performance</b>                                                       |
| <b>S-5</b>     | <b>Methodology reported in the literature for protective layer<br/>focus on Zn anode</b> |

**S-1: Field emission scanning electron microscope (FE-SEM)**

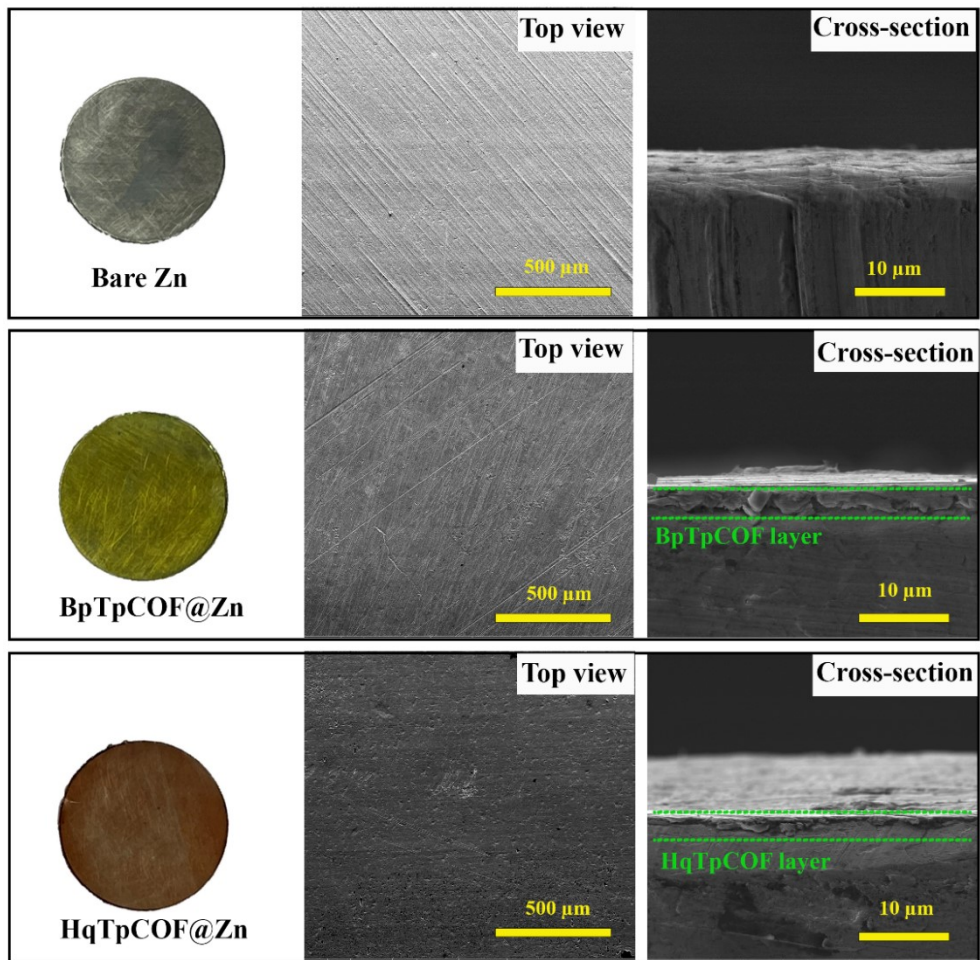

**Figure S1.** FE-SEM images of the samples.

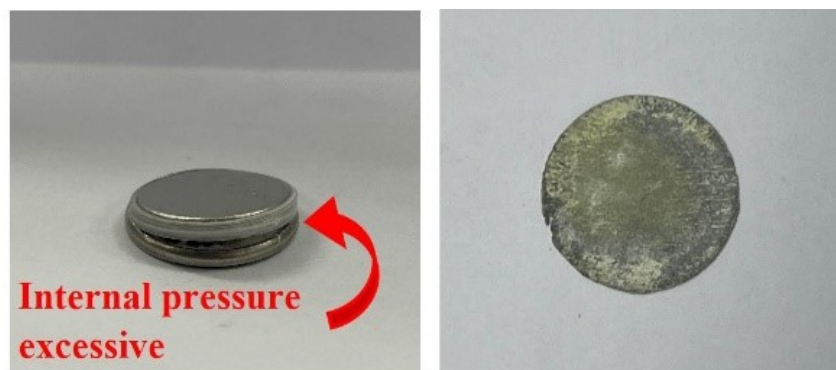

**Figure S2.** The BpTpCOF@Zn cell and BpTpCOF@Zn electrode after the battery failed.

## S-2: Powder X-ray diffraction (PXRD) spectra of COF powder

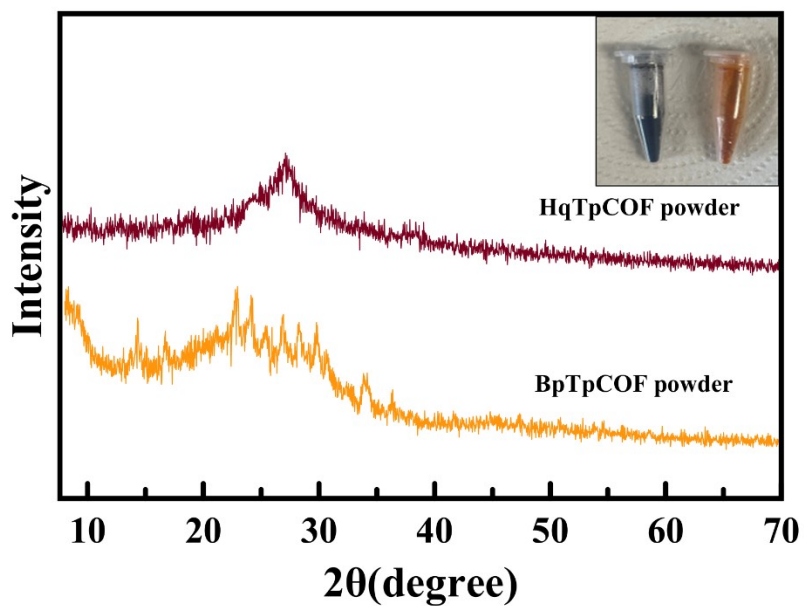

**Figure S3.** PXRD spectra of HqTpCOF and BpTpCOF powder.

PXRD spectra were used to characterize COF's structure. The conditions were used: 40 kV, 15 mA, step size: 0.02°. In Fig.S2, two COFs' power demonstrates a broader peak around  $2\theta = 27^\circ$ . This peak broadening can be ascribed to  $\pi$ - $\pi$  stacking between benzene rings in the COF layer. The resultant PXRD pattern is compared to the literature<sup>1,2</sup>.

### S-3: X-ray photoelectron spectroscopy (XPS)

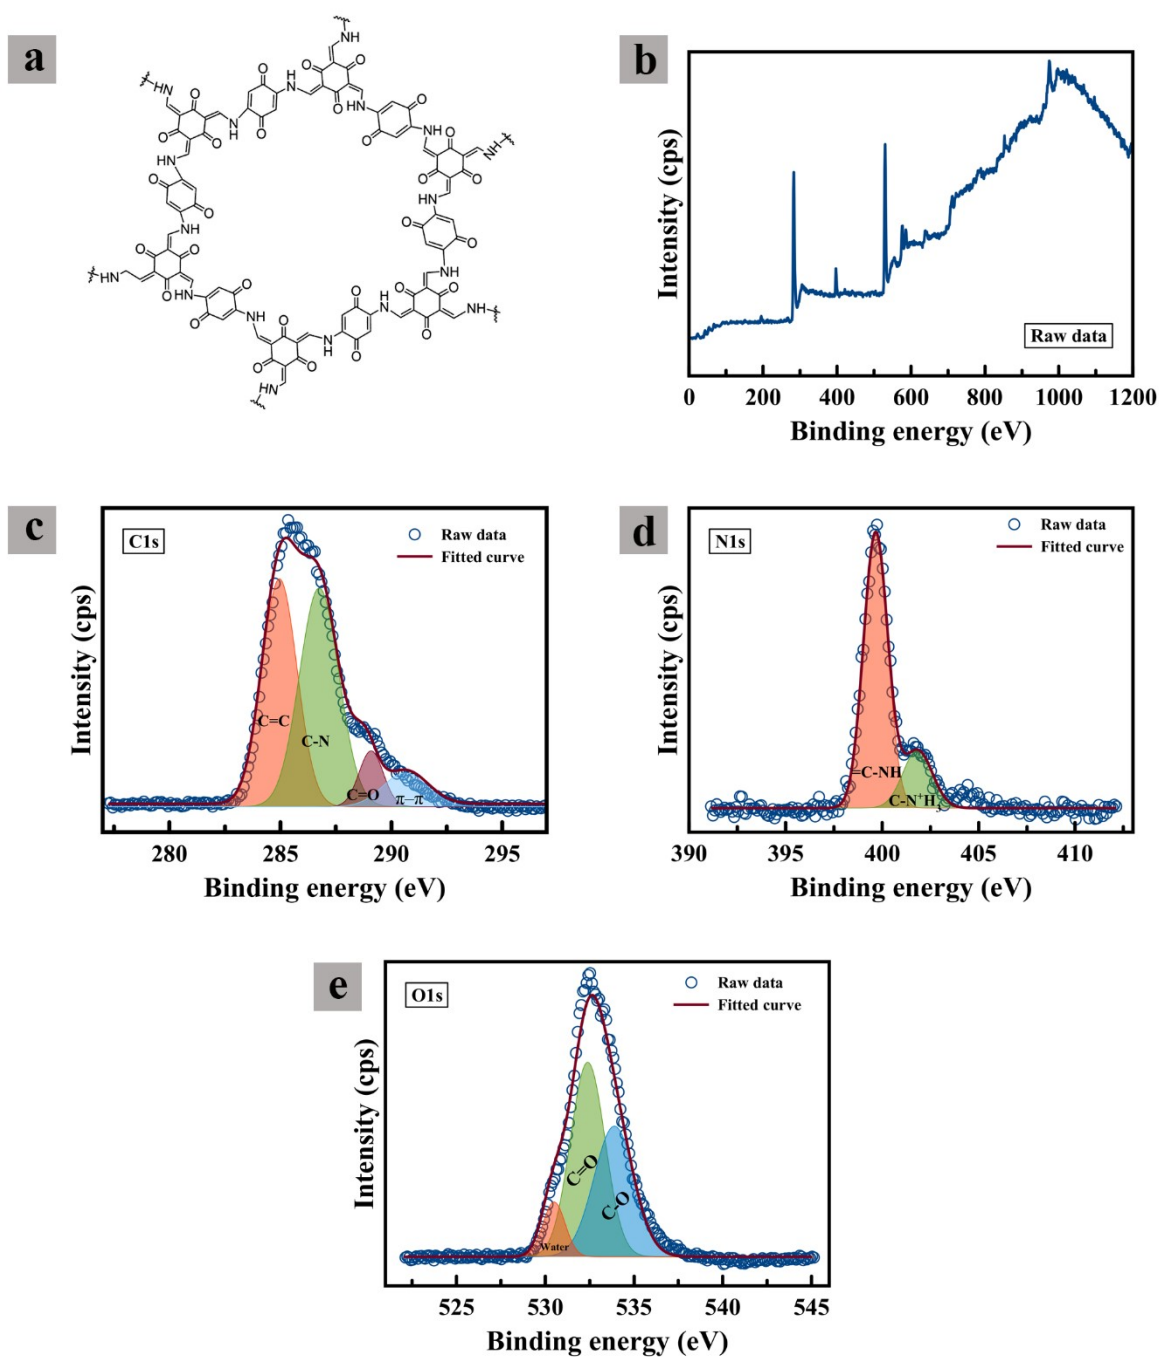

**Figure S4.** Schema of XPS spectra: a) Molecular scheme of HqTpCOF, b) Raw data, c) C 1s, d) N 1s, and e) O 1s peaks.

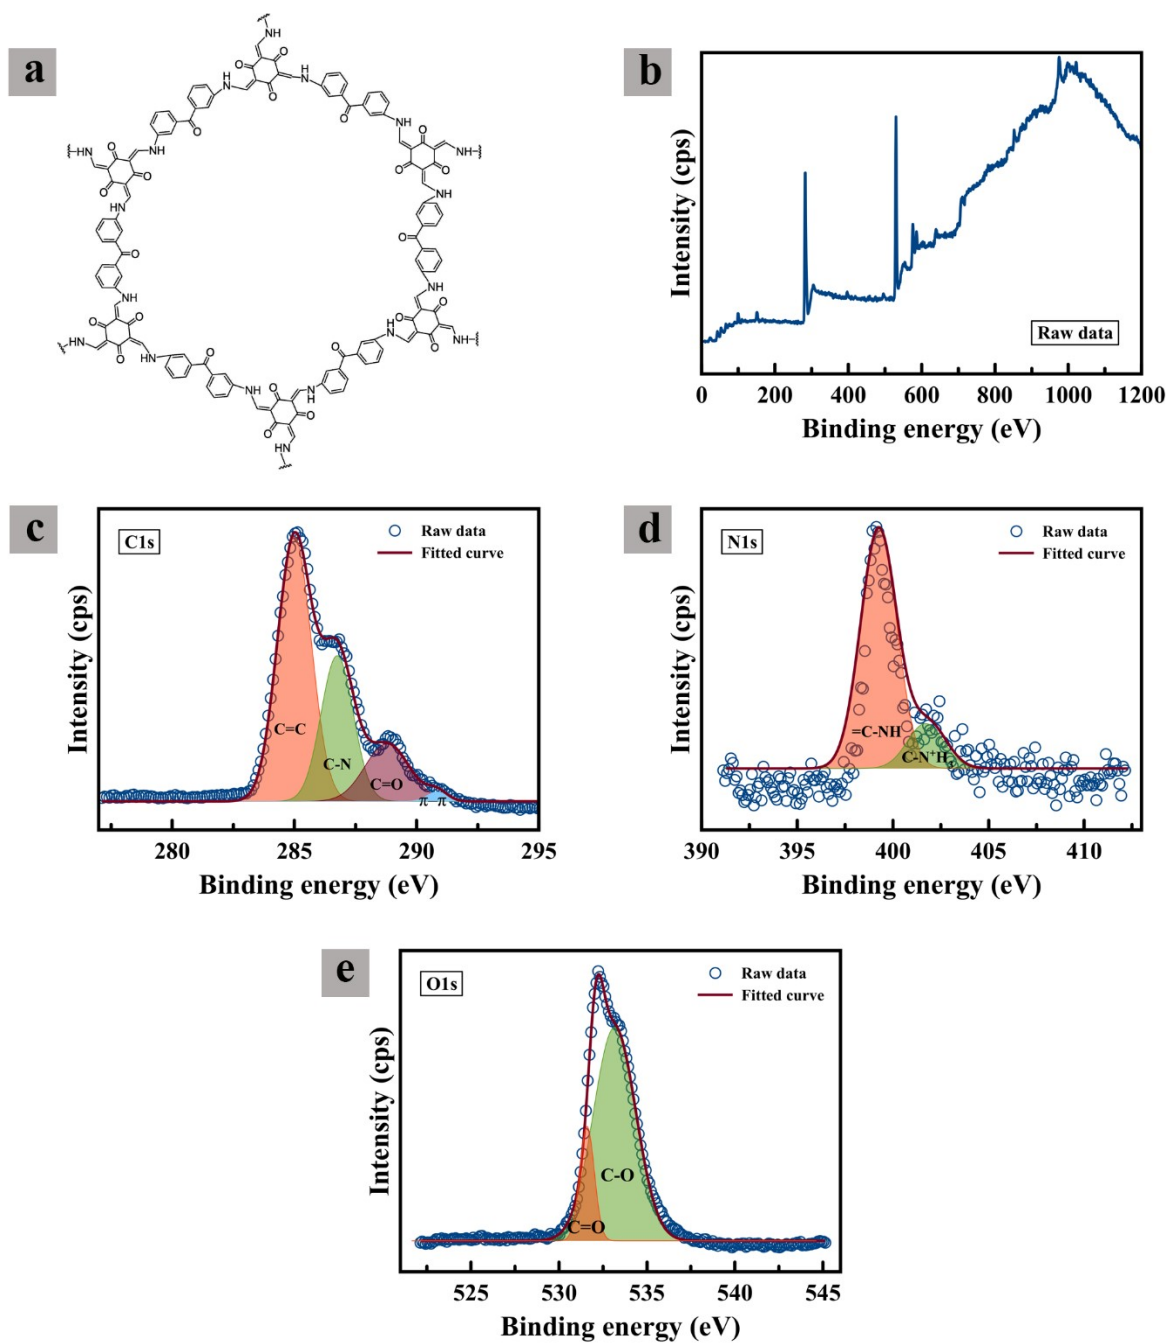

**Figure S5.** Schema of XPS spectra: a) Molecular scheme of BpTpCOF, b) Raw data, c) C 1s, d) N 1s, and e) O 1s peaks.

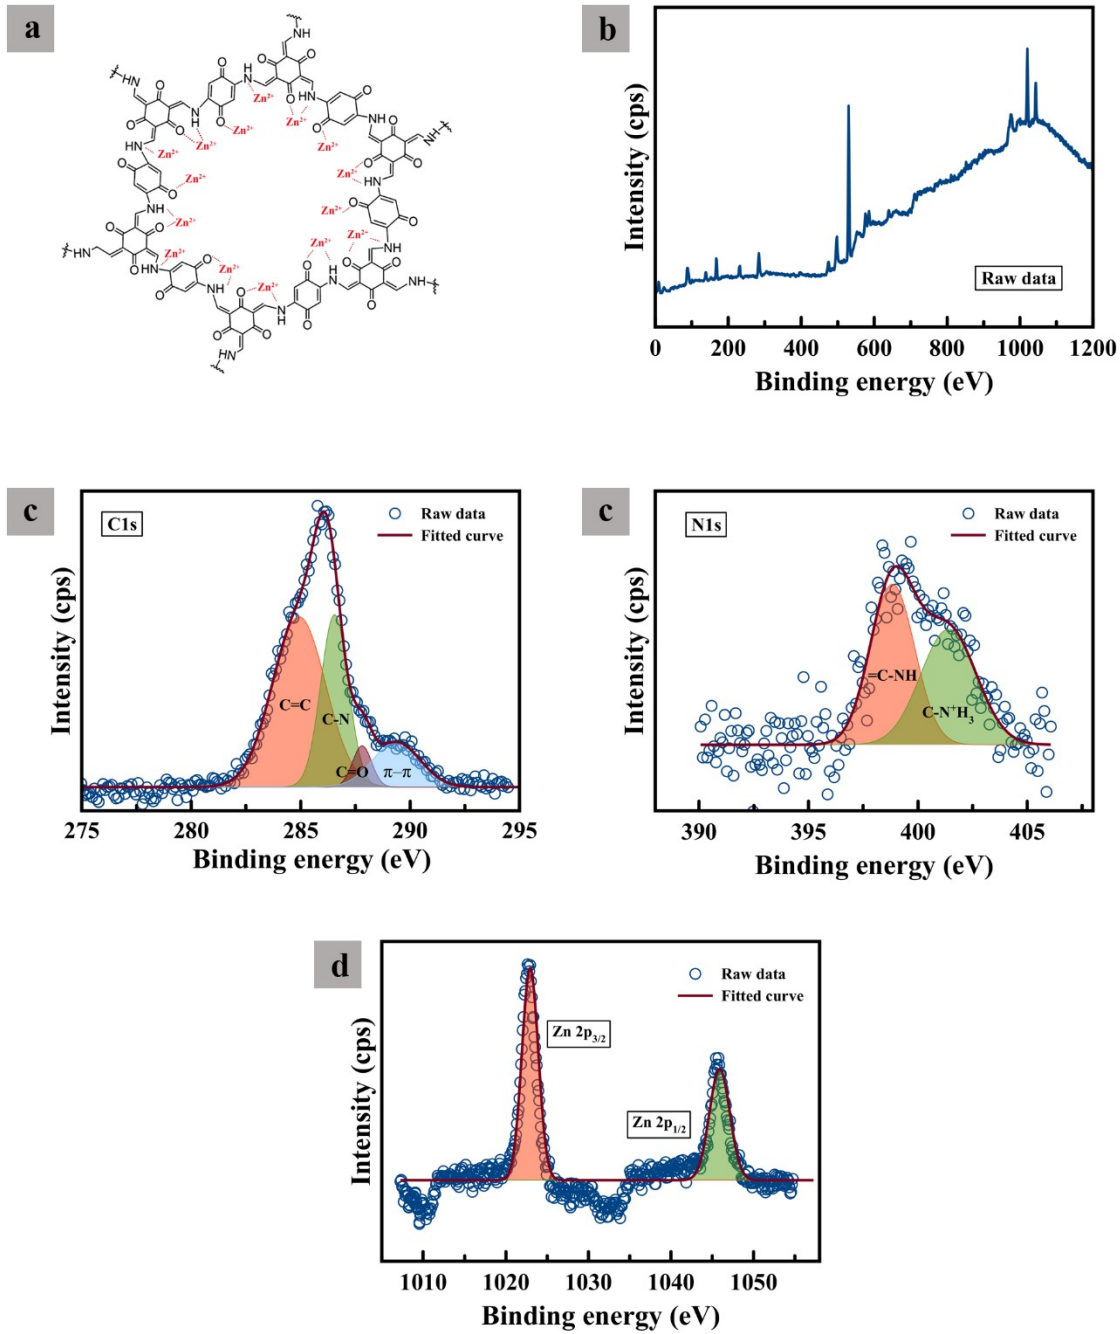

**Figure S6.** Schema of XPS spectra soaking in electrolyte: a) Molecular scheme of HqTpCOF, b) Raw data, c) C 1s, d) N 1s, and e) Zn 2p peaks.

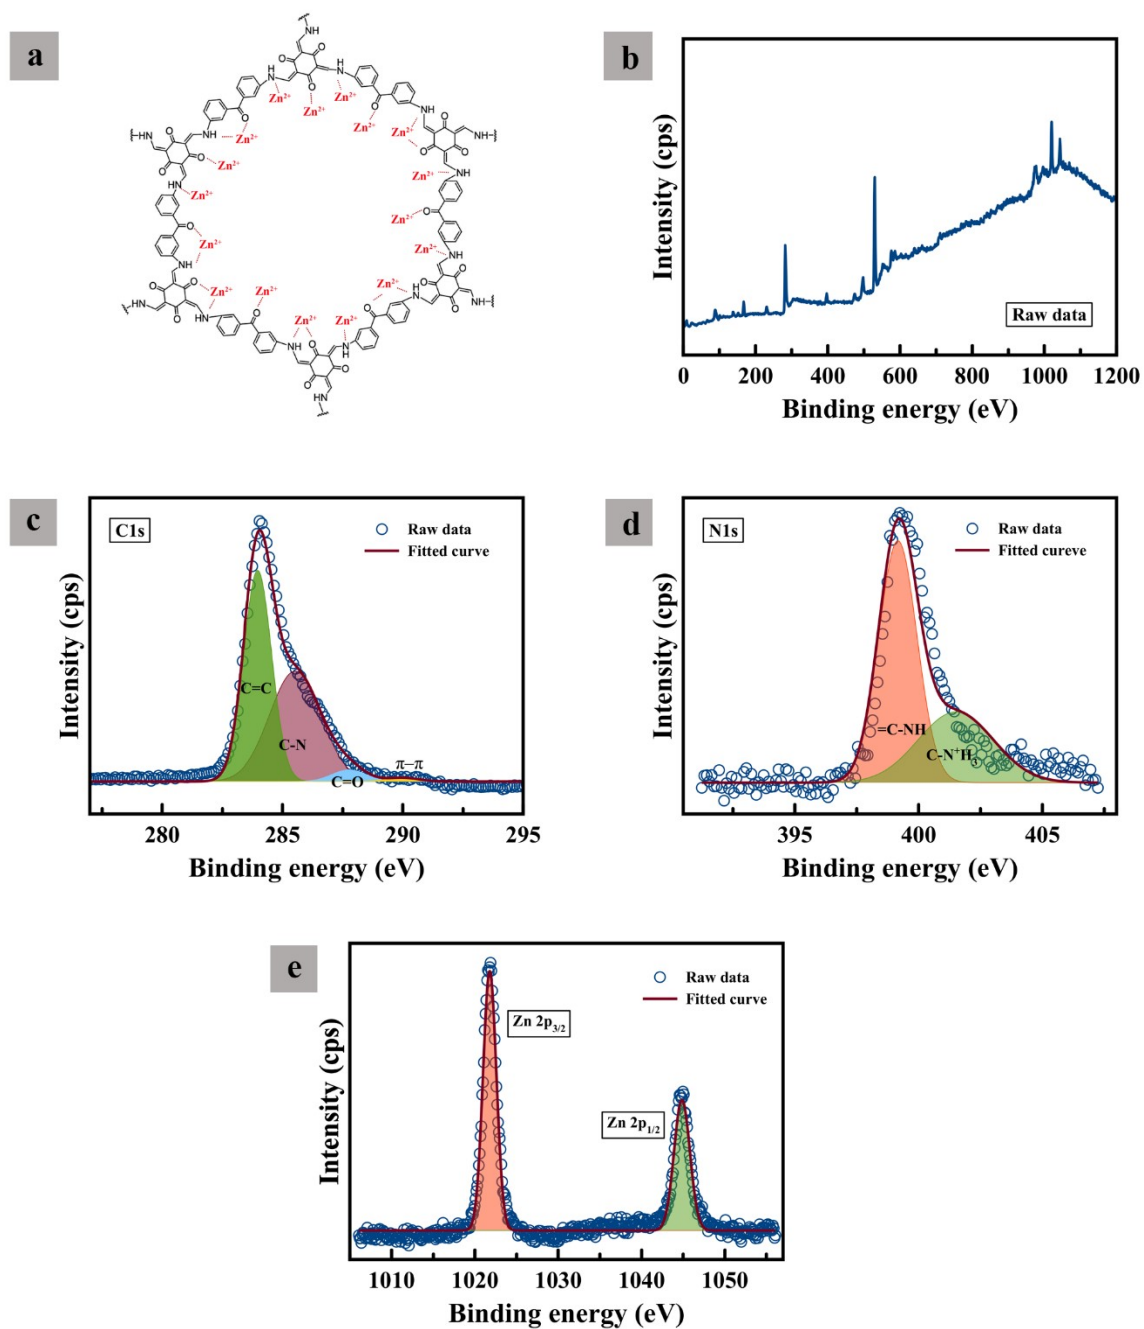

**Figure S7.** Schema of XPS spectra after soaking in electrolyte: a) Molecular scheme of BpTpCOF, b) Raw data, c) C 1s, d) N 1s, and e) Zn 2p peaks.



**Table S1.** The deconvoluted XPS profiles of C1s

| No. | Conditions        | Binding energy |          |          |                | Area under graph |          |          |           | Percentage |          |          |             |
|-----|-------------------|----------------|----------|----------|----------------|------------------|----------|----------|-----------|------------|----------|----------|-------------|
|     |                   | Peak C-C       | Peak C-N | Peak C=O | Peak $\pi-\pi$ | C-C              | C-N      | C=O      | $\pi-\pi$ | %C-C       | %C-N     | %C=O     | % $\pi-\pi$ |
| 1   | BpTpCOF -pristine | 285            | 286.5    | 288.5    | 290.79         | 5801.933         | 4377.373 | 1673.126 | 306.1569  | 47.7188    | 36.00231 | 13.76086 | 2.51803     |
| 2   | BpTpCOF -soaked   | 285            | 286.5    | 288.5    | 290.79         | 14251.53         | 8596.927 | 988.8445 | 91.96462  | 59.5569    | 35.92641 | 4.132365 | 0.384319    |
| 3   | HqTpCOF -pristine | 285            | 286.5    | 288.5    | 290.79         | 7855.073         | 8435.065 | 1324.448 | 1481.096  | 41.13534   | 44.17263 | 6.93585  | 7.756185    |
| 4   | HqTpCOF -soaked   | 285            | 286.5    | 288.5    | 290.79         | 1952.297         | 1818.996 | 170.7408 | 461.0557  | 44.33925   | 41.31181 | 3.877749 | 10.47118    |

**Table S2.** The deconvoluted XPS profiles of N1s

| No. | Condition         | Binding energy |                     | Area under graph |                | Percentage |                 |
|-----|-------------------|----------------|---------------------|------------------|----------------|------------|-----------------|
|     |                   | Peak =C-NH     | Peak N <sup>+</sup> | =C-NH            | N <sup>+</sup> | % =C-NH    | %N <sup>+</sup> |
| 1   | BpTpCOF -pristine | 399.1          | 401.7               | 763.2618         | 143.1326       | 84.20857   | 15.79143        |
| 2   | BpTpCOF -soaked   | 399.1          | 401.7               | 890.9019         | 511.2319       | 63.53901   | 36.46099        |
| 3   | HqTpCOF -pristine | 399.1          | 401.7               | 1670.409         | 428.9245       | 79.56853   | 20.43147        |
| 4   | HqTpCOF -soaked   | 399.1          | 401.7               | 230.3591         | 208.3899       | 52.50362   | 47.49638        |

S-4: The effects of thickness of COFs films

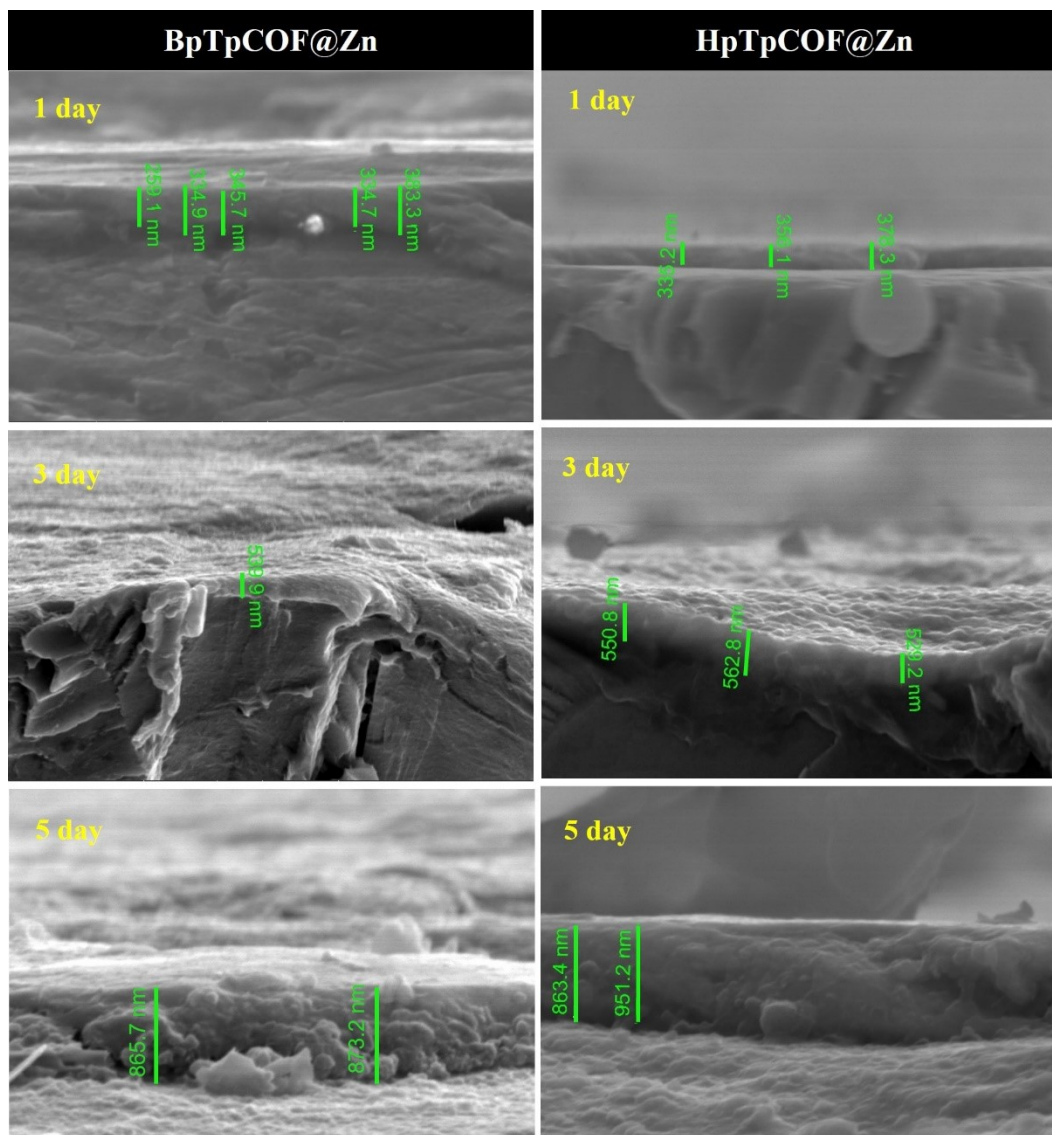

Figure S8. The thickness of the COFs layer at various times to dip.

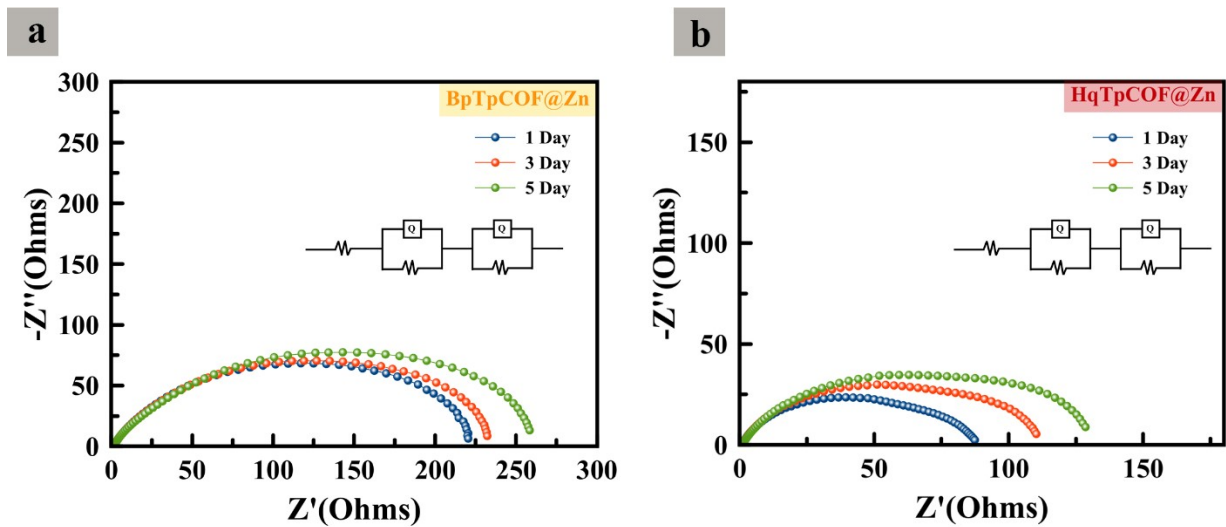

**Figure S9.** EIS plot for different electrodes at various COFs layer thicknesses: a) BpTpCOF@Zn and b) HqTpCOF@Zn.

**Table S3.** Resistance of the BpTpCOF@Zn anode at various thickness layers of COFs: Fitted with the equivalent circuit as shown in Fig. S9a.

| Duration | SEI resistance ( $R_{\text{COF}}$ )( $\Omega$ ) | Charge transfer resistance ( $R_{\text{ct}}$ )( $\Omega$ ) |
|----------|-------------------------------------------------|------------------------------------------------------------|
| 1 Day    | 42.24                                           | 184                                                        |
| 3 Day    | 52.44                                           | 190.1                                                      |
| 5 Day    | 59.27                                           | 213.9                                                      |

**Table S4.** Resistance of the HqTpCOF@Zn anode at various thickness layers of COFs: Fitted with the equivalent circuit as shown in Fig. S9b.

| <b>Duration</b> | <b>SEI resistance (<math>R_{\text{COF}}</math>)(<math>\Omega</math>)</b> | <b>Charge transfer resistance (<math>R_{\text{ct}}</math>)(<math>\Omega</math>)</b> |
|-----------------|--------------------------------------------------------------------------|-------------------------------------------------------------------------------------|
| 1 Day           | 11.5                                                                     | 77.64                                                                               |
| 3 Day           | 27.58                                                                    | 89.27                                                                               |
| 5 Day           | 36.1                                                                     | 97.06                                                                               |

### S-5: Electrochemical performance

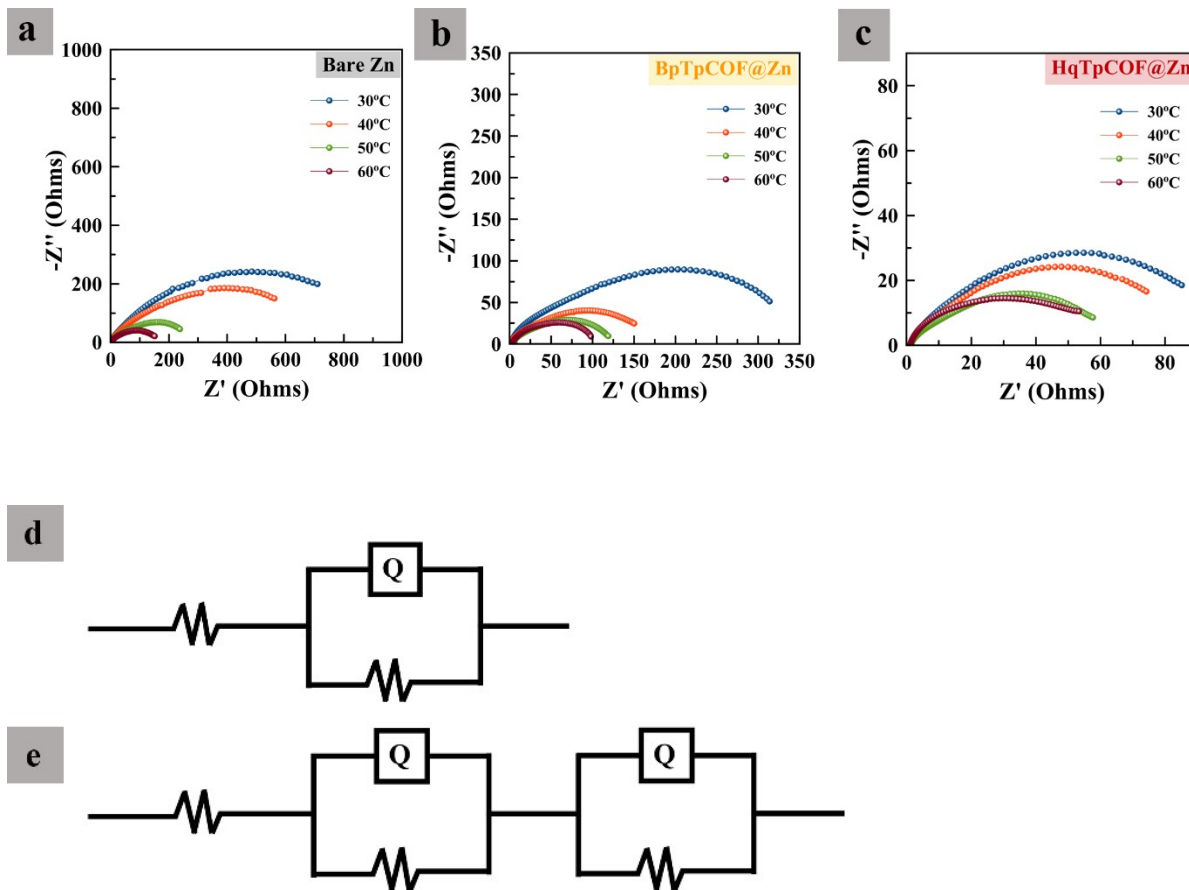

**Figure S10.** EIS images: a) Nyquist plots of bare Zn symmetrical cells at various temperatures, b) Nyquist plots of BpTpCOF@Zn symmetrical cells at various temperatures, c) Nyquist plots of HqTpCOF@Zn symmetrical cells at various temperatures, d) Equivalent circuit model: bare Zn electrode, and e) Equivalent circuit model: COFs@Zn electrodes.

**Table S5.** Charge-transfer resistance ( $R_{ct}$ ) of the different anodes at various temperatures: equivalent circuit as shown in Figs. S10a-c .

| Temperature (°C) | Charge-transfer resistance ( $\Omega$ ) |            |            |
|------------------|-----------------------------------------|------------|------------|
|                  | Bare Zn                                 | BpTpCOF@Zn | HqTpCOF@Zn |
| 30               | 913.3                                   | 299.4      | 78.83      |
| 40               | 605.1                                   | 139.8      | 63.73      |
| 50               | 226.4                                   | 108        | 55.96      |
| 60               | 136.4                                   | 73.79      | 32.52      |

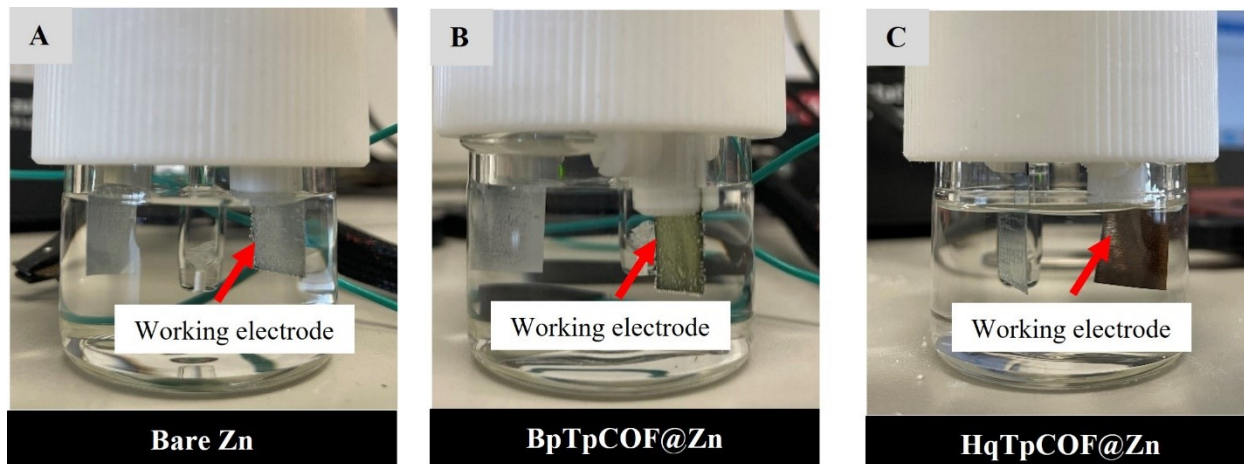

**D**

| Sample     | Corrosion potential, $E_{\text{corr}}$ (mV) | Corrosion current, $I_{\text{corr}}$ (mA) |
|------------|---------------------------------------------|-------------------------------------------|
| Bare Zn    | -973                                        | 7.92                                      |
| BpTpCOF@Zn | -970                                        | 7.77                                      |
| HqTpCOF@Zn | -953                                        | 7.2                                       |

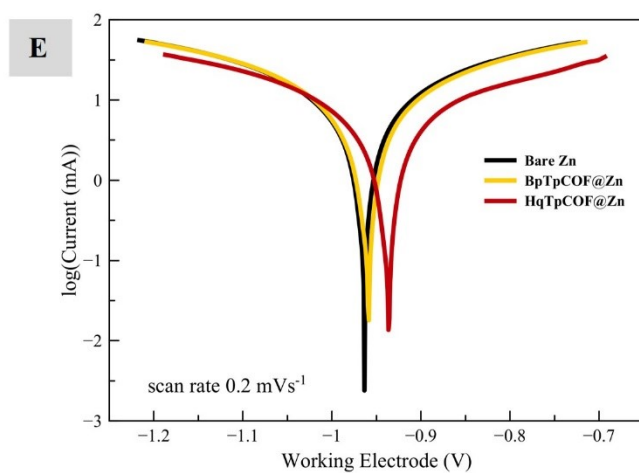

**Figure S11.** Linear polarization test.



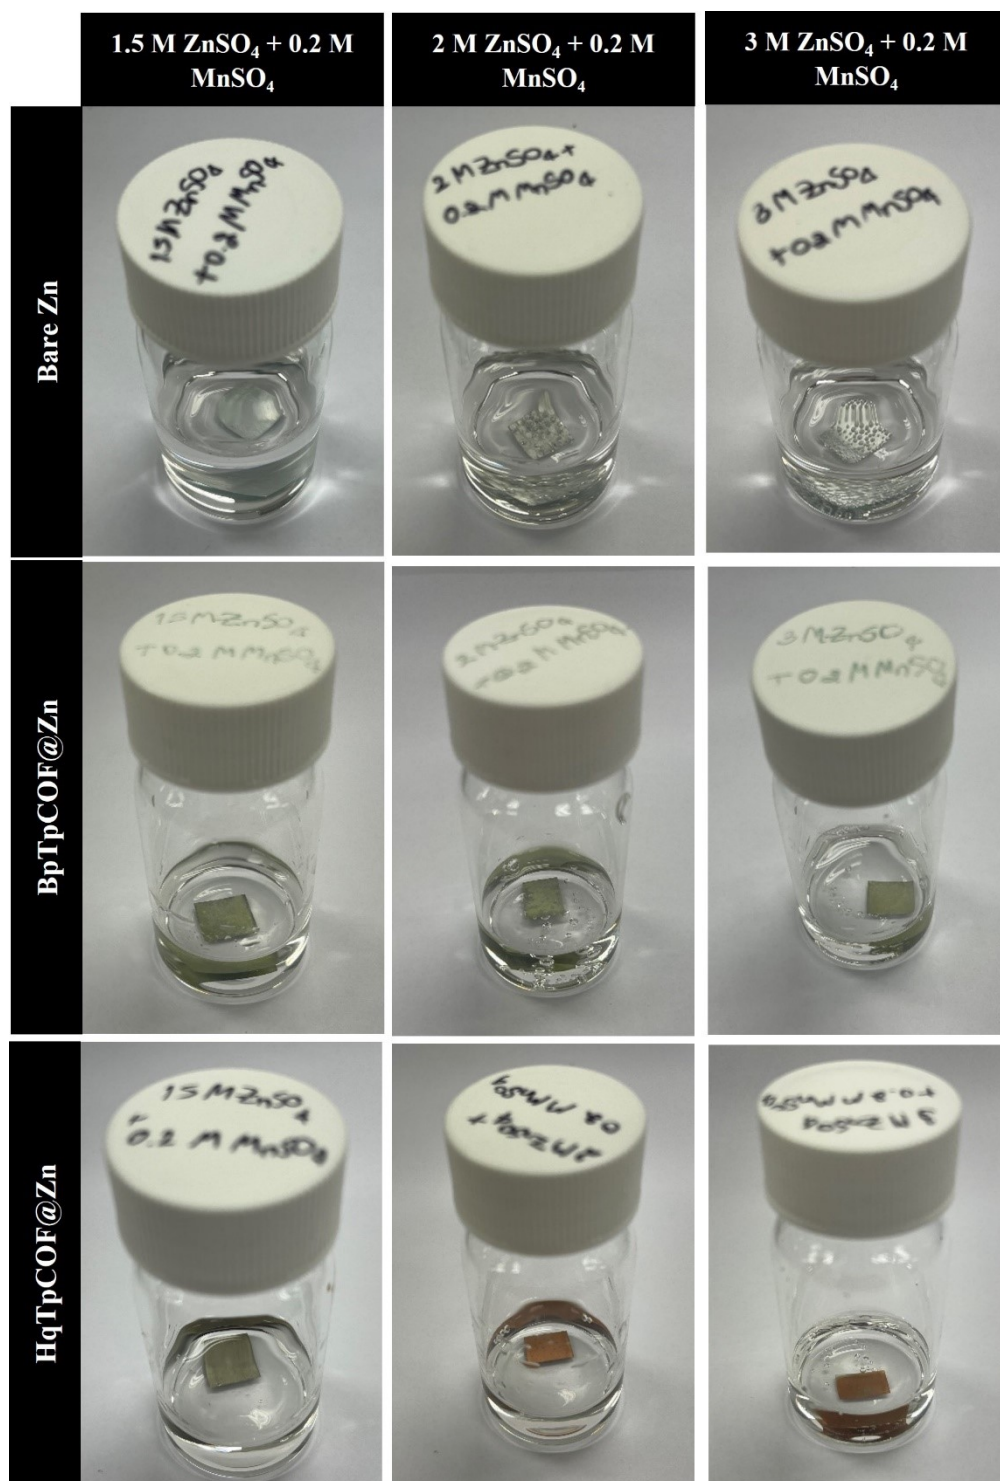

**Figure S12.** Images of different Zn electrodes in various concentrations of electrolytes: 1.5 M ZnSO<sub>4</sub>+ 0.2 M MnSO<sub>4</sub>, 2 M ZnSO<sub>4</sub>+0.2 M MnSO<sub>4</sub>, and 3 M ZnSO<sub>4</sub>+0.2 M MnSO<sub>4</sub> in 14 days.

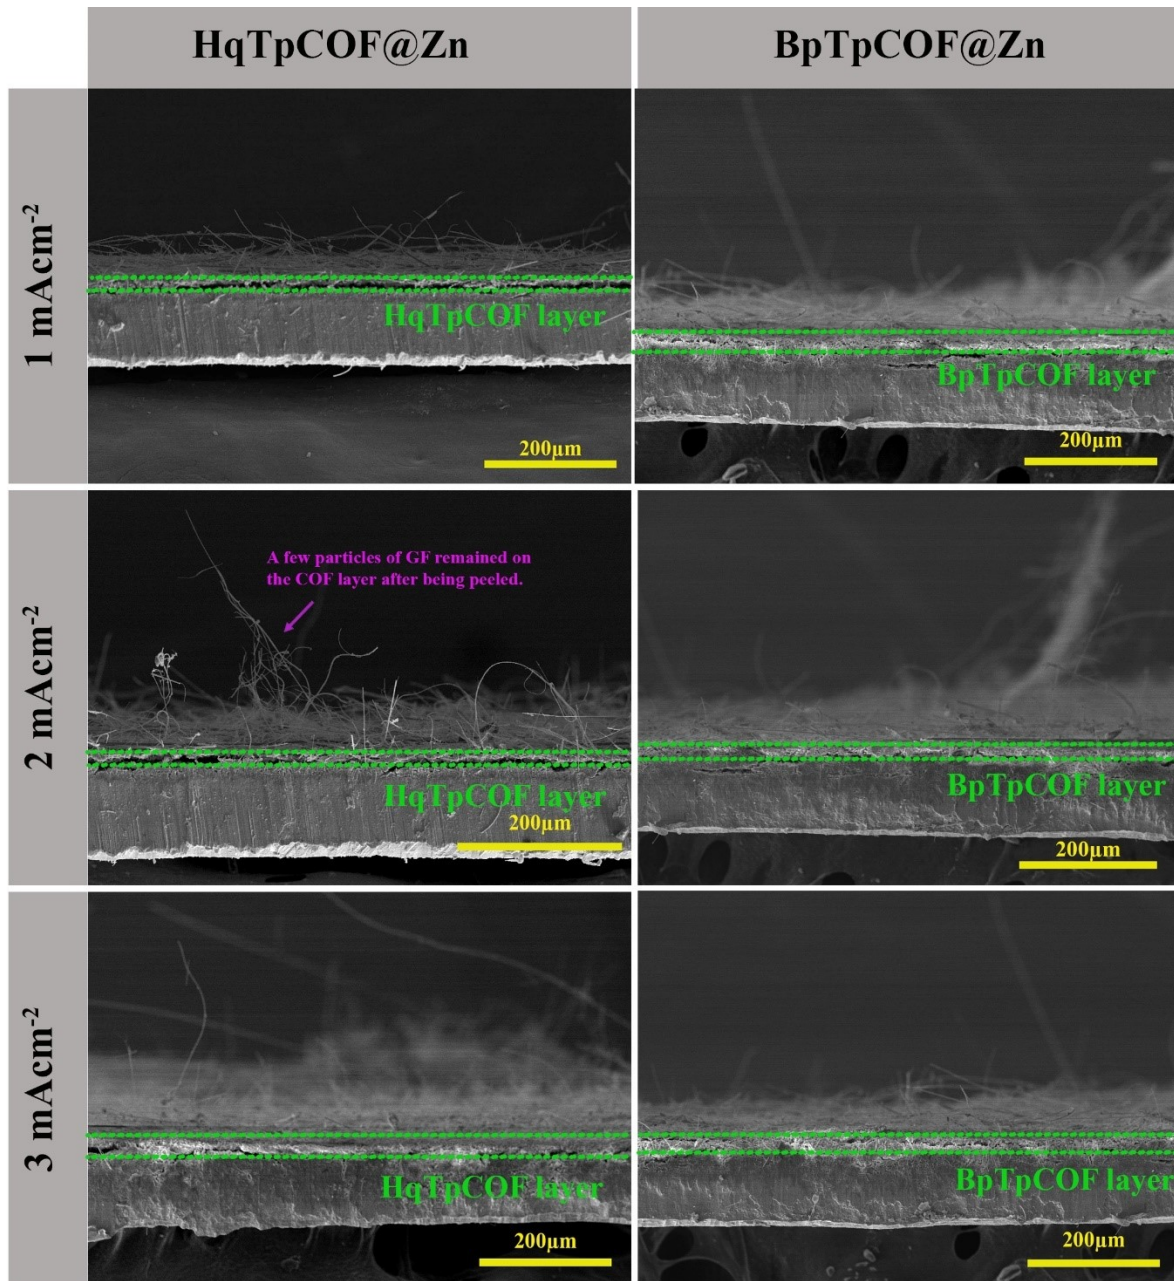

**Figure S13.** Cross-section of Zn anodes: Bare Zn, BpTpCOF@Zn, and HqTpCOF@Zn from symmetrical cells after 100 cycles at various current densities (1, 2, and 3 mA cm<sup>-2</sup>).

**S-4: Methodology reported in the literature for Metal/Covalent organic frameworks layer: focus on Zn anode**

|                                 | Materials              | Processing Method                                    | Electrolytes                                   | Current density          | Areal Capacity           | Voltages polarization | Cycling performance | Ref.      |
|---------------------------------|------------------------|------------------------------------------------------|------------------------------------------------|--------------------------|--------------------------|-----------------------|---------------------|-----------|
| MOFs                            | ZIF-8                  | In situ growth                                       | 2M ZnSO <sub>4</sub>                           | 0.5 mA cm <sup>-2</sup>  | 0.2 mAh cm <sup>-2</sup> | ~70 mV                | >680 h              | 3         |
|                                 | ZIF-11                 | Doctor blading                                       | 2M ZnSO <sub>4</sub>                           | 0.4 mA cm <sup>-2</sup>  | 0.2 mAh cm <sup>-2</sup> | -                     | >740 h              | 4         |
|                                 |                        |                                                      |                                                | 0.5 mA cm <sup>-2</sup>  | 0.2 mAh cm <sup>-2</sup> | -                     | >620 h              |           |
|                                 |                        |                                                      |                                                | 1 mA cm <sup>-2</sup>    | 0.5 mAh cm <sup>-2</sup> | -                     | >555 h              |           |
| Zn(TFSI) <sub>2</sub> -TFEP@MOF | -                      | 1 M Zn(TFSI) <sub>2</sub> -TFEP@MOF/H <sub>2</sub> O | 0.5 mA cm <sup>-2</sup>                        | 0.5 mAh cm <sup>-2</sup> | ~20 mV                   | >700 h                | 5                   |           |
| COFs                            | DAAQ-TFP COF           | Dip-coating                                          | 2M ZnSO <sub>4</sub>                           | 1 mA cm <sup>-2</sup>    | 1 mAh cm <sup>-2</sup>   | ~36 mV                | >420 h              | 1         |
|                                 |                        |                                                      |                                                | 2 mA cm <sup>-2</sup>    |                          | ~40 mV                | >270 h              |           |
|                                 | TpPa-SO <sub>3</sub> H | Transfer                                             | 1M ZnSO <sub>4</sub>                           | 1 mA cm <sup>-2</sup>    | 5 mAh cm <sup>-2</sup>   | ~81 mV                | >1000 h             | 6         |
|                                 | HqTpCOF@Zn             | Dip-coating                                          | 2M ZnSO <sub>4</sub> + 0.2 M MnSO <sub>4</sub> | 1 mA cm <sup>-2</sup>    | 1 mAh cm <sup>-2</sup>   | ~39 mV                | >700 h              | This work |
| BpTpCOF@Zn                      | ~55 mV                 |                                                      |                                                |                          |                          | >300 h                |                     |           |

**Table S6.** Comparison of performance between this work and other MOFs/COFs as protective layers at symmetric cell configuration.

## References

1. J. H. Park, M.-J. Kwak, C. Hwang, K.-N. Kang, N. Liu, J.-H. Jang and B. A. Grzybowski, *Adv. Mater.*, 2021, **33**, 2101726, doi: 10.1002/adma.202101726.
2. S. Kandambeth, B. P. Biswal, H. D. Chaudhari, K. C. Rout, S. Kunjattu H., S. Mitra, S. Karak, A. Das, R. Mukherjee, U. K. Kharul and R. Banerjee, *Adv. Mater.*, 2017, **29**, 1603945, doi: 10.1002/adma.201603945.
3. M. Cui, B. Yan, F. Mo, X. Wang, Y. Huang, J. Fan, C. Zhi and H. Li, *Chem. Eng. J.*, 2022, **434**, 134688, doi: 10.1016/j.cej.2022.134688.
4. M. He, C. Shu, A. Hu, R. Zheng, M. Li, Z. Ran and J. Long, *Energy Storage Materials*, 2022, **44**, 452-460, doi: 10.1016/j.ensm.2021.11.010.
5. Z. Li, L. Ye, G. Zhou, W. Xu, K. Zhao, X. Zhang, S. Hong, T. Ma, M.-C. Li, C. Liu and C. Mei, *Chem. Eng. J.*, 2023, **457**, 141160, doi: 10.1016/j.cej.2022.141160.
6. J. Zhao, Y. Ying, G. Wang, K. Hu, Y. D. Yuan, H. Ye, Z. Liu, J. Y. Lee and D. Zhao, *Energy Storage Materials*, 2022, **48**, 82-89, doi: 10.1016/j.ensm.2022.02.054.
